# Supplementary material for: Positive Selection and Duplication of Bat TRIM Family Proteins
Source: MDPI journal article supplement (doi:10.3390/v15040875), 2023-03-29
Supplement: s1 [file s1]

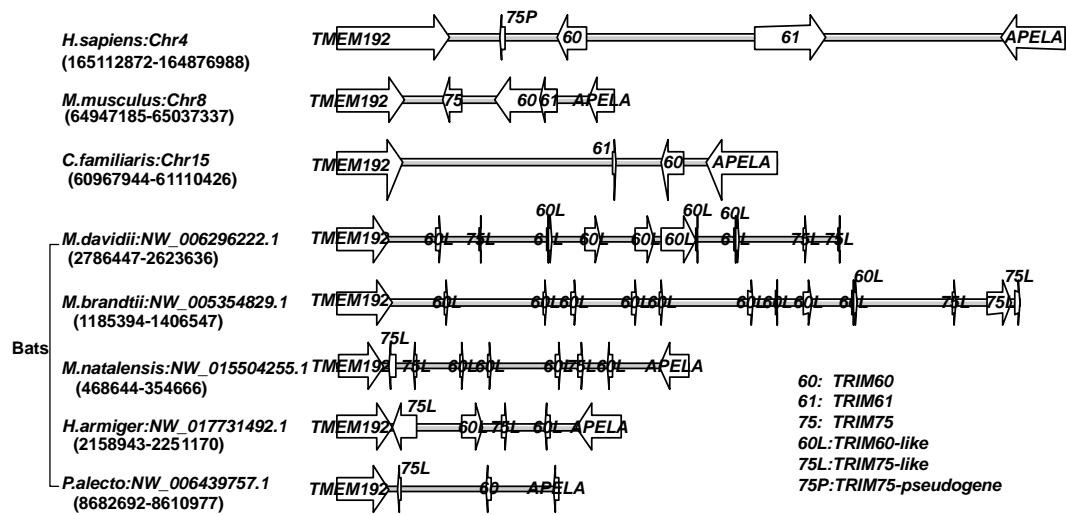

**Figure S1.** Genomic representation of the *TRIM60/61/75* locus in bats and other selected mammals. The common boundaries of the *TRIM60/61/75* locus are *TMEM192* and *APELA*. Genes are indicated by hollow arrows with size proportional to their length.

**Table S1.** Accession number of bat TRIM family proteins.

|                  | A.jamaicensis                                      | D.rotundus                                                           | E.fuscus                         | H.armiger                        | M.brandtii                                                                             | M.davidii                                                                              | M.lucifugus                                                                            | M.molossus                                                                             | M.myotis                                                                               | M.natalensis                                       | P.alecto                         | P.discolor                       | P.kuhlii                         | P.vampyrus                       | R.aegyptiacus                    | S.hondurensis                                      |
|------------------|----------------------------------------------------|----------------------------------------------------------------------|----------------------------------|----------------------------------|----------------------------------------------------------------------------------------|----------------------------------------------------------------------------------------|----------------------------------------------------------------------------------------|----------------------------------------------------------------------------------------|----------------------------------------------------------------------------------------|----------------------------------------------------|----------------------------------|----------------------------------|----------------------------------|----------------------------------|----------------------------------|----------------------------------------------------|
| TRIM1            | XP_036984802.1                                     | XP_024418406.1                                                       | XP_028008276.1                   | XP_019490518.1                   | XP_005884904.1                                                                         | XP_006753855.1                                                                         | XP_006092704.1                                                                         | XP_036106507.1                                                                         | XP_036153945.1                                                                         | XP_016064484.1                                     | XP_006916547.1                   | XP_028382048.1                   | XP_036314569.1                   | XP_011363578.1                   | XP_015984823.2                   | XP_036910983.1                                     |
| TRIM2            | XP_036984801.1                                     | XP_024418405.1                                                       | XP_008144485.1                   | XP_019483810.1                   | XP_005884910.1                                                                         | XP_006753867.1                                                                         | XP_006092751.1                                                                         | XP_036106483.1                                                                         | XP_036152968.1                                                                         | XP_016064468.1                                     | XP_006916546.2                   | XP_028382156.1                   | XP_036313040.1                   | XP_011363577.1                   | XP_036084204.1                   | XP_036910982.1                                     |
| TRIM1 MID2       | XP_037023007.1                                     | XP_024407374.1                                                       | XP_027988151.1                   | XP_019518001.1                   | XP_005865280.1                                                                         | XP_015420765.1                                                                         | XP_006082318.1                                                                         | XP_036127104.1                                                                         | XP_036159915.1                                                                         | XP_016053961.1                                     | XP_024904660.1                   | XP_035872827.1                   | XP_036316594.1                   | XP_023389878.1                   | XP_036082307.1                   | XP_036921735.1                                     |
| TRIM2            | XP_037023967.1                                     | XP_024424623.1                                                       | XP_028007658.1                   | XP_019496759.1                   | XP_005871486.1                                                                         | XP_015423535.1                                                                         | XP_006081861.1                                                                         | XP_036096367.1                                                                         | XP_036167696.1                                                                         | XP_016053260.1                                     | XP_024898412.1                   | XP_035887808.1                   | XP_036281298.1                   | XP_023385944.1                   | XP_036089453.1                   | XP_036914262.1                                     |
| TRIM3            | XP_036990406.1                                     | XP_024425100.1                                                       | XP_008158069.1                   | XP_019488030.1                   | XP_014388821.1                                                                         | XP_015423515.1                                                                         | XP_006105633.1                                                                         | XP_036098110.1                                                                         | XP_036181134.1                                                                         | XP_016072737.1                                     | XP_006915722.1                   | XP_035886057.1                   | XP_036284168.1                   | XP_011383478.1                   | XP_036077004.1                   | XP_036907485.1                                     |
| TRIM4            | XP_036990813.1                                     | XP_024427122.1                                                       | XP_028001573.1                   | XP_019488953.1                   |                                                                                        |                                                                                        |                                                                                        | XP_036136639.1                                                                         | XP_036165823.1                                                                         | XP_016073176.1                                     | XP_006918710.1                   | XP_028362446.1                   | XP_036265906.1                   | XP_011384617.1                   | XP_036082148.1                   |                                                    |
| TRIM5            | XP_037009768.1<br>XP_037002205.1                   | XP_024430436.1<br>XP_024430433.1<br>XP_024430439.1<br>XP_024430426.1 | XP_027993432.1<br>XP_008158694.1 | XP_019523972.1                   | XP_005884915.2<br>XP_005867353.1<br>XP_014389423.1<br>XP_014397487.1<br>XP_014399628.1 | XP_015422163.1<br>XP_006767986.2<br>XP_006767987.1<br>XP_006770130.1<br>XP_006752668.1 | XP_014305207.1<br>XP_023614536.1<br>XP_023614537.1<br>XP_006094622.1<br>XP_014305203.1 | XP_036115119.1<br>XP_036113725.1<br>XP_036115125.1<br>XP_036109537.1<br>XP_036115127.1 | XP_036181107.1<br>XP_036181100.1<br>XP_036181111.1<br>XP_036181110.1<br>XP_036180353.1 | XP_016070465.1<br>XP_016072768.1<br>XP_016070412.1 | XP_035886047.1<br>XP_035886082.1 |                                  | XP_036283986.1                   |                                  | XP_036077542.1                   | XP_036907464.1<br>XP_036885687.1<br>XP_036893640.1 |
| TRIM6            | XP_037002195.1                                     | XP_024430445.1                                                       | XP_008158663.1                   | XP_019523991.1                   | XP_005860882.1                                                                         |                                                                                        | XP_006094617.1                                                                         | XP_036115454.1                                                                         | XP_036181101.1                                                                         | XP_016070518.1                                     | XP_006915740.1                   | XP_028371304.2                   | XP_036284005.1                   | XP_011381433.1                   | XP_015982322.1                   | XP_036893644.1                                     |
| TRIM7            | XP_037009346.1                                     |                                                                      |                                  | XP_019490279.1                   |                                                                                        |                                                                                        |                                                                                        | XP_014303339.2                                                                         | XP_036095976.1                                                                         | XP_036170035.1                                     |                                  | XP_015453443.1                   | XP_035870841.1                   | XP_036306354.1                   | XP_016013889.2                   | XP_036908772.1                                     |
| TRIM8            | XP_037015304.1                                     | XP_024411450.1                                                       | XP_008142471.1                   | XP_019491872.1                   | XP_005878304.1                                                                         | XP_015414756.1                                                                         |                                                                                        | XP_036120951.1                                                                         | XP_036192023.1                                                                         | XP_016075566.1                                     | XP_006920964.1                   | XP_028367172.1                   | XP_036293755.1                   | XP_011384124.1                   | XP_016010005.1                   | XP_036919932.1                                     |
| TRIM9            | XP_037011696.1                                     | XP_024423856.1                                                       | XP_008137279.1                   | XP_019488786.1                   | XP_005867951.1                                                                         | XP_006773839.1                                                                         | XP_006100289.1                                                                         | XP_036126825.1                                                                         | XP_036162525.1                                                                         | XP_016053591.1                                     | XP_006920259.1                   | XP_028363760.1                   | XP_036292946.1                   | XP_011383863.1                   | XP_036095110.1                   | XP_036910179.1                                     |
| TRIM10           | XP_036997200.1                                     | XP_024413569.1                                                       |                                  | XP_019488327.1                   | XP_014391303.1                                                                         |                                                                                        | XP_023600963.1                                                                         | XP_036103798.1                                                                         | XP_036212436.1                                                                         | XP_016070256.1                                     | XP_024903839.1                   | XP_035879633.1                   |                                  | XP_011382299.1                   | XP_015976150.1                   | XP_036901906.1                                     |
| TRIM11           | XP_036996374.1                                     | XP_024416685.1                                                       | XP_028016269.1                   | XP_019490470.1<br>XP_019487974.1 | XP_005864957.1                                                                         |                                                                                        |                                                                                        | XP_036096962.1                                                                         | XP_036168248.1                                                                         | XP_016066113.1                                     | XP_006923338.1                   | XP_028390380.1                   | XP_036306497.1                   | XP_011370226.1                   | XP_015983949.2                   | XP_036924816.1                                     |
| TRIM13           | XP_036990901.1<br>XP_037020080.1                   | XP_024425663.1<br>XP_024422552.1                                     | XP_028017178.1                   | XP_019506395.1                   | XP_014392672.1                                                                         | XP_015417797.1                                                                         | XP_023604460.1                                                                         | XP_036106342.1                                                                         | XP_036154403.1                                                                         | XP_016060955.1                                     | XP_024900545.1                   | XP_028382429.1<br>XP_028382121.2 | XP_036315116.1                   | XP_011368623.1                   | XP_015998575.1                   | XP_036917274.1<br>XP_036910991.1                   |
| TRIM14           | XP_036996676.1                                     | XP_024415735.1                                                       | XP_008140089.1                   | XP_019505070.1                   |                                                                                        |                                                                                        | XP_006096546.1                                                                         | XP_036117456.1                                                                         | XP_036186142.1                                                                         |                                                    | XP_006911607.1                   | XP_028380619.1                   | XP_036289136.1                   | XP_011364609.1                   | XP_016001770.2                   | XP_036891593.1                                     |
| TRIM15           |                                                    |                                                                      |                                  | XP_019488325.1                   |                                                                                        |                                                                                        |                                                                                        | XP_036103800.1                                                                         |                                                                                        |                                                    | XP_006913708.3                   |                                  |                                  | XP_011382301.1                   | XP_015976122.2                   |                                                    |
| TRIM16           | XP_037021458.1                                     | XP_024420635.1                                                       | XP_027989679.1                   | XP_019497030.1                   | XP_005857393.1                                                                         | XP_006762801.1                                                                         | XP_006097430.1                                                                         | XP_036124419.1                                                                         | XP_036197596.1                                                                         | XP_016051991.1                                     | XP_006908465.1                   | XP_028390424.1                   | XP_036308061.1                   | XP_011357290.1                   | XP_015988000.2<br>XP_016016790.2 | XP_036926833.1                                     |
| TRIM17           | XP_036996379.1                                     | XP_024416643.1                                                       |                                  | XP_019487971.1                   |                                                                                        | XP_015427035.1                                                                         | XP_006100257.2                                                                         | XP_036096964.1                                                                         | XP_036168251.1                                                                         | XP_016066126.1                                     | XP_006923339.3                   | XP_035888697.1                   | XP_036306503.1                   | XP_011370225.2                   | XP_015983951.2                   | XP_036924819.1                                     |
| TRIM18 Midline-1 | XP_037013412.1                                     | XP_024425656.1                                                       | XP_027988574.1                   | XP_019506773.1                   | XP_005880872.1                                                                         | XP_006763866.1                                                                         | XP_006104243.1                                                                         | XP_036127395.1                                                                         | XP_036169091.1                                                                         | XP_016067119.1                                     | XP_006906100.1                   | XP_035872532.1                   | XP_036276376.1                   | XP_011361206.1                   | XP_015995641.1                   | XP_036911466.1                                     |
| TRIM19 PML       | XP_036990409.1                                     | XP_024412999.1                                                       | XP_008155295.1                   | XP_019523497.1                   | XP_005882857.1                                                                         | XP_006753305.1                                                                         | XP_006087912.1                                                                         | XP_036113734.1                                                                         | XP_036204422.1                                                                         | XP_016057187.1                                     | XP_024896162.1                   | XP_028363520.1                   | XP_036312022.1                   | XP_023380152.1                   | XP_015980459.2                   | XP_036902968.1                                     |
| TRIM20           | XP_037010557.1                                     | XP_024409044.1                                                       | XP_028001472.1                   | XP_019488407.1                   | XP_014400628.1                                                                         | XP_015414020.1                                                                         | XP_023611040.1                                                                         | XP_036136091.1                                                                         | XP_036166422.1                                                                         | XP_016066853.1                                     | XP_006913958.1                   | XP_028366066.1                   | XP_036265728.1                   | XP_011374846.1                   | XP_015977766.2                   | XP_036899257.1                                     |
| TRIM21           | XP_036991629.1                                     | XP_024428422.1                                                       | XP_027994367.1                   |                                  | XP_005885969.1                                                                         | XP_006762400.1                                                                         | XP_014316233.1                                                                         | XP_036115934.1                                                                         | XP_036181084.1                                                                         | XP_016070523.1                                     | XP_006905883.2                   | XP_035884805.1                   | XP_036283469.1                   | XP_011375746.1                   | XP_016013478.2                   | XP_036924534.1                                     |
| TRIM22           | XP_036995001.1<br>XP_037002200.1<br>XP_037002204.1 | XP_024430440.1<br>XP_024430446.1                                     | XP_027993442.1<br>XP_008158665.1 | XP_019523971.1<br>XP_019523961.1 | XP_014395497.1<br>XP_014390732.1                                                       | XP_015415099.1<br>XP_006770132.2                                                       | XP_023614551.1<br>XP_014316245.2                                                       | XP_036115126.1                                                                         | XP_036181096.1<br>XP_036181102.1                                                       | XP_016070466.1                                     | XP_024905226.1                   | XP_035886074.1<br>XP_035886065.1 | XP_036284042.1<br>XP_036284002.1 | XP_023380642.1<br>XP_023380643.1 | XP_016005550.2<br>XP_036077538.1 | XP_036907458.1<br>XP_036907454.1<br>XP_036891411.1 |
| TRIM23           | XP_037006667.1                                     | XP_024434187.1                                                       | XP_008160093.1                   | XP_019507971.1                   | XP_005885800.1                                                                         | XP_006762481.1                                                                         | XP_006081467.1                                                                         | XP_036135027.1                                                                         | XP_036164033.1                                                                         | XP_016058128.1                                     | XP_006913142.1                   | XP_035876229.1                   | XP_036265159.1                   | XP_011369389.1                   | XP_015991713.2                   | XP_036918745.1                                     |

|                 |                |                 |                |                                                                                                          |                                                    |                                  |                                                    |                |                                  |                                  |                                  |                |                                                    |                                  |                                  |                                  |
|-----------------|----------------|-----------------|----------------|----------------------------------------------------------------------------------------------------------|----------------------------------------------------|----------------------------------|----------------------------------------------------|----------------|----------------------------------|----------------------------------|----------------------------------|----------------|----------------------------------------------------|----------------------------------|----------------------------------|----------------------------------|
| TRIM24<br>TIF1A | XP_037015148.1 | XP_024410784.1  | XP_008148712.1 | XP_019508832.1                                                                                           | XP_0144002186.1                                    | XP_015428153.1                   | XP_023601075.1                                     | XP_036102180.1 | XP_036184910.1                   | XP_016077393.1                   | XP_024901618.1                   | XP_028381122.1 | XP_036284009.1                                     | XP_011357865.1                   | XP_016017357.2                   | XP_036905014.1                   |
| TRIM25          | XP_037019619.1 | XP_0244229210.1 | XP_008146137.1 | XP_019492147.1                                                                                           | XP_014400311.1                                     | XP_006758754.1                   | XP_006095695.1                                     | XP_036123733.1 | XP_036196376.1                   | XP_016067850.1<br>XP_016062677.1 | XP_015454759.1                   | XP_028375735.1 | XP_036310092.1                                     | XP_023389286.1                   | XP_036077874.1                   | XP_036893322.1                   |
| TRIM26          | XP_036997201.1 | XP_024413562.1  | XP_027989633.1 | XP_019488833.1                                                                                           | XP_005871639.1                                     | XP_015426142.1                   | XP_014301754.1                                     | XP_036103795.1 | XP_036212416.1                   | XP_016070260.1                   | XP_006913709.1                   | XP_035879625.1 | XP_036284849.1                                     | XP_011382297.1                   | XP_015976184.1                   | XP_036901904.1                   |
| TRIM27<br>RFP   | XP_037008114.1 | XP_024413671.1  |                | XP_019490301.1                                                                                           |                                                    |                                  |                                                    | XP_036104931.1 |                                  |                                  | XP_024900105.1                   | XP_028364838.1 |                                                    | XP_011380254.1                   | XP_015976191.1                   | XP_036901924.1                   |
| TRIM28<br>TIF1B | XP_037004326.1 |                 | XP_008159311.1 | XP_019488847.1                                                                                           | XP_005857336.1<br>XP_014392028.1                   | XP_015416286.1                   | XP_023600474.1                                     | XP_036129753.1 | XP_036167295.1                   | XP_016071317.1                   | XP_015445219.1                   | XP_035869278.1 | XP_036281936.1                                     | XP_011382936.1                   | XP_015981020.2                   | XP_036885593.1<br>XP_036903480.1 |
| TRIM29          | XP_037017864.1 | XP_024425342.1  | XP_028014192.1 | XP_019519113.1                                                                                           | XP_014394335.1                                     | XP_015416111.1                   | XP_023604790.1                                     | XP_036116040.1 | XP_036167140.1                   | XP_016063144.1                   | XP_006915711.1                   | XP_035884283.1 | XP_036286145.1                                     | XP_023382015.1                   | XP_015974305.2                   | XP_036884431.1                   |
| TRIM32          | XP_037010605.1 | XP_024418187.1  | XP_008150332.1 | XP_019512391.1                                                                                           | XP_014384371.1                                     | XP_015425380.1                   | XP_006091144.1                                     | XP_036117713.1 | XP_036185719.1                   | XP_016069241.1                   | XP_015448880.1                   | XP_028364934.1 | XP_036288713.1                                     | XP_011359263.1                   | XP_036094412.1                   | XP_036915044.1                   |
| TRIM33          | XP_037008266.1 | XP_024426356.1  | XP_008145585.1 | XP_019514739.1                                                                                           | XP_014390149.1                                     | XP_015419019.1                   | XP_014314418.2                                     | XP_036127929.1 | XP_036198226.1                   | XP_016078775.1                   | XP_024908066.1                   | XP_028358497.1 | XP_036308731.1                                     | XP_023391318.1                   | XP_036090953.1                   | XP_036894825.1                   |
| TRIM34          | XP_037002196.1 | XP_024430435.1  | XP_008158661.1 | XP_019523990.1                                                                                           | XP_005860880.1                                     | XP_006752662.1                   | XP_006094619.1                                     | XP_036114173.1 | XP_036181098.1                   | XP_016070520.1                   | XP_015447817.1<br>XP_015447843.1 |                | XP_036283976.1                                     | XP_011381436.1<br>XP_011381454.1 | XP_036077535.1                   | XP_036893642.1                   |
| TRIM35          | XP_036994989.1 | XP_024424871.1  | XP_028015206.1 | XP_019491739.1                                                                                           | XP_014395533.1                                     | XP_006764828.1                   | XP_006082013.1                                     | XP_036096561.1 | XP_036168604.1                   | XP_016070368.1                   | XP_006917034.1                   | XP_028376784.1 | XP_036279685.1                                     | XP_011358609.1                   | XP_016009788.1                   | XP_036898145.1                   |
| TRIM36          | XP_037022961.1 | XP_024419098.1  | XP_028005529.1 |                                                                                                          | XP_014399726.1                                     | XP_015413941.1                   | XP_014317469.1                                     | XP_036135435.1 | XP_036165225.1                   | XP_016080430.1                   | XP_006913352.2                   | XP_035876559.1 | XP_036265847.1                                     | XP_011356548.1                   | XP_036081949.1                   | XP_036888225.1                   |
| TRIM37          | XP_037019632.1 | XP_024429057.1  | XP_028010520.1 | XP_019492252.1                                                                                           | XP_014385417.1                                     | XP_006756252.1                   | XP_023615380.1                                     | XP_036123513.1 | XP_036196287.1                   | XP_016066146.1                   | XP_024897585.1                   | XP_035889545.1 | XP_036296093.1                                     | XP_023376161.1                   | XP_015978552.2                   | XP_036925928.1                   |
| TRIM38          | XP_037008898.1 | XP_024426053.1  | XP_028009730.1 | XP_019488748.1<br>XP_019488733.1<br>XP_019488741.1<br>XP_019488745.1<br>XP_019488728.1<br>XP_019488729.1 | XP_014384083.1<br>XP_014392543.1<br>XP_014392561.1 | XP_015423610.1<br>XP_015416973.1 | XP_023602431.1<br>XP_023602432.1<br>XP_014306189.2 | XP_036129231.1 | XP_036199251.1<br>XP_036199250.1 | XP_016071746.1                   | XP_006923551.1                   | XP_028359273.1 | XP_036309071.1<br>XP_036309009.1                   | XP_023390166.1                   | XP_036090653.1                   | XP_036907307.1                   |
| TRIM39          | XP_036997203.1 | XP_024413566.1  | XP_027989637.1 | XP_019490250.1                                                                                           | XP_005863306.1                                     | XP_006774096.1                   | XP_023600935.1                                     | XP_036103796.1 | XP_036212434.1                   | XP_016070263.1                   | XP_006913711.1                   | XP_028364454.1 | XP_036284852.1                                     | XP_011382296.1                   | XP_015976168.1                   | XP_036902775.1                   |
| TRIM40          |                |                 |                |                                                                                                          |                                                    |                                  |                                                    | XP_036104511.1 |                                  | XP_016070246.1                   | XP_024903835.1                   | XP_028365945.1 |                                                    | XP_023381157.1                   | XP_036093744.1                   |                                  |
| TRIM41          | XP_037009295.1 | XP_024408032.1  | XP_027991236.1 | XP_019490278.1                                                                                           | XP_005884574.1<br>XP_005862395.1                   | XP_006766918.1<br>XP_006761511.1 | XP_006085719.1<br>XP_006109915.3                   | XP_036095970.1 | XP_036169202.1<br>XP_036159989.1 | XP_016057017.1                   | XP_015453491.1<br>XP_006921080.1 | XP_035869931.1 | XP_036306346.1                                     | XP_023387590.1<br>XP_011364369.1 | XP_016013859.2<br>XP_016019775.1 | XP_036908767.1                   |
| TRIM42          | XP_036995169.1 | XP_024421876.1  | XP_008150821.1 | XP_019501502.1                                                                                           | XP_005870045.1                                     | XP_006759895.1                   | XP_006083823.1                                     | XP_036123140.1 | XP_036187427.1                   | XP_016062538.1                   | XP_006907252.1                   | XP_028374765.1 | XP_036286406.1                                     | XP_011355754.1                   | XP_015997338.1                   | XP_036917054.1                   |
| TRIM43          |                |                 | XP_008147435.1 | XP_019483846.1<br>XP_019483843.1                                                                         | XP_005864899.1                                     |                                  | XP_023601914.1                                     | XP_036114211.1 |                                  |                                  | XP_006926933.1                   |                | XP_036284544.1<br>XP_036284539.1                   | XP_011361605.1<br>XP_011361606.2 | XP_016008662.2                   |                                  |
| TRIM44          | XP_036984115.1 | XP_024414840.1  | XP_028009426.1 | XP_019495077.1                                                                                           | XP_005864567.1                                     | XP_015414501.1                   | XP_006103800.2                                     | XP_036115310.1 | XP_036182069.1                   | XP_016061709.1                   | XP_015441886.1                   | XP_035885142.1 | XP_036282989.1                                     | XP_023384445.1                   | XP_015978706.2                   | XP_036896409.1                   |
| TRIM45          | XP_036991035.1 | XP_024426274.1  | XP_008145445.1 | XP_019516988.1                                                                                           | XP_005860006.1                                     | XP_015418964.1                   | XP_006097551.1                                     | XP_036128565.1 | XP_036200102.1                   | XP_016078851.1                   | XP_015450957.1                   | XP_035871034.1 | XP_036308586.1                                     | XP_011364844.1                   | XP_016016382.1                   | XP_036894773.1                   |
| TRIM46          | XP_036988579.1 | XP_024426713.1  | XP_008153933.1 | XP_019518247.1                                                                                           | XP_014396133.1                                     | XP_006775830.1                   | XP_006097910.2                                     | XP_036128306.1 | XP_036200557.1                   | XP_016077114.1                   | XP_006923598.1                   | XP_028359073.1 | XP_036298692.1                                     | XP_011364726.1                   | XP_015991118.1                   | XP_036906484.1                   |
| TRIM47          | XP_037013937.1 | XP_024409791.1  | XP_027986425.1 | XP_019499777.1<br>XP_019499764.1                                                                         |                                                    | XP_015426249.1                   | XP_014301297.1                                     | XP_036124963.1 | XP_036195890.1<br>XP_036197559.1 |                                  | XP_006912462.1<br>XP_015445093.1 | XP_028376647.1 | XP_036267999.1<br>XP_036268416.1                   | XP_011360365.1                   | XP_015983193.2                   | XP_036921227.1                   |
| TRIM48          |                |                 |                |                                                                                                          |                                                    |                                  |                                                    |                | XP_036160014.1                   |                                  |                                  |                |                                                    |                                  |                                  |                                  |
| TRIM49          |                |                 | XP_028012837.1 |                                                                                                          |                                                    | XP_006766425.2                   |                                                    |                |                                  |                                  |                                  |                | XP_036284545.1<br>XP_036284541.1<br>XP_036284547.1 |                                  |                                  |                                  |
| TRIM50          | XP_037010645.1 | XP_024427074.1  | XP_008136993.1 | XP_019502387.1                                                                                           | XP_005877257.1                                     | XP_006773437.1                   | XP_023609170.1                                     | XP_036135753.1 | XP_036166198.1                   | XP_016054556.1                   | XP_006918621.1                   | XP_028372652.2 | XP_036264890.1                                     | XP_011369834.1                   | XP_016001968.2                   | XP_036910614.1                   |
| TRIM51          |                |                 | XP_028012838.1 |                                                                                                          |                                                    |                                  |                                                    |                |                                  |                                  | XP_006926931.1                   |                | XP_036284548.1                                     | XP_011361603.1                   | XP_016008664.2                   |                                  |

|        |                                                                      |                                                                      |                                                                      |                                  |                                                                                                                                                                                                    |                                                                                                                            |                                                                                                                                                                                                                      |                                                                                        |                                                                                                                                                                                  |                                                                      |                |                                                    |                                                                                                                                                                                                    |                                  |                                  |                                                    |
|--------|----------------------------------------------------------------------|----------------------------------------------------------------------|----------------------------------------------------------------------|----------------------------------|----------------------------------------------------------------------------------------------------------------------------------------------------------------------------------------------------|----------------------------------------------------------------------------------------------------------------------------|----------------------------------------------------------------------------------------------------------------------------------------------------------------------------------------------------------------------|----------------------------------------------------------------------------------------|----------------------------------------------------------------------------------------------------------------------------------------------------------------------------------|----------------------------------------------------------------------|----------------|----------------------------------------------------|----------------------------------------------------------------------------------------------------------------------------------------------------------------------------------------------------|----------------------------------|----------------------------------|----------------------------------------------------|
| TRIM52 |                                                                      |                                                                      | XP_008156905.2                                                       |                                  | XP_014391990.1                                                                                                                                                                                     | XP_006766919.1                                                                                                             |                                                                                                                                                                                                                      | XP_036095982.1                                                                         | XP_036169201.1                                                                                                                                                                   | XP_016057019.1                                                       | XP_015453492.1 |                                                    | XP_036306363.1                                                                                                                                                                                     | XP_023387599.1                   | XP_036079935.1                   |                                                    |
| TRIM54 | XP_037002458.1                                                       | XP_024408714.1                                                       | XP_008136571.1                                                       | XP_019492369.1                   | XP_005875023.1                                                                                                                                                                                     | XP_006779579.1                                                                                                             | XP_023619244.1                                                                                                                                                                                                       | XP_036118882.1                                                                         | XP_036190950.1                                                                                                                                                                   | XP_016065713.1                                                       | XP_006910495.1 | XP_028372684.2                                     | XP_036290833.1                                                                                                                                                                                     | XP_011354785.1<br>XP_011383085.1 | XP_015984510.1                   | XP_036922759.1                                     |
| TRIM55 | XP_037004832.1                                                       | XP_024428043.1                                                       | XP_028014596.1                                                       | XP_019488231.1                   | XP_005867988.2                                                                                                                                                                                     | XP_015422670.1                                                                                                             | XP_006109310.1<br>XP_023611268.1                                                                                                                                                                                     | XP_036120175.1                                                                         | XP_036194288.1                                                                                                                                                                   | XP_016061902.1                                                       | XP_024896974.1 | XP_035887060.1                                     | XP_036292938.1                                                                                                                                                                                     | XP_023389039.1                   | XP_016008370.2                   | XP_036914536.1                                     |
| TRIM56 | XP_036995113.1                                                       | XP_024427350.1                                                       | XP_028001069.1                                                       | XP_019502454.1                   | XP_014405642.1                                                                                                                                                                                     | XP_006773472.2                                                                                                             | XP_023602810.1                                                                                                                                                                                                       | XP_036135203.1                                                                         | XP_036165513.1                                                                                                                                                                   | XP_016054458.1                                                       | XP_024907289.1 | XP_035876659.1                                     | XP_036266197.1                                                                                                                                                                                     | XP_011369902.1                   | XP_036081369.1                   | XP_036910759.1                                     |
| TRIM58 | XP_037021705.1                                                       | XP_024416413.1                                                       | XP_008149749.1                                                       | XP_019489162.1                   |                                                                                                                                                                                                    |                                                                                                                            |                                                                                                                                                                                                                      | XP_036095548.1                                                                         | XP_036170073.1                                                                                                                                                                   |                                                                      | XP_006923341.1 | XP_035888699.1                                     | XP_036306308.1                                                                                                                                                                                     | XP_011370221.1                   | XP_015983952.2                   | XP_036924748.1                                     |
| TRIM59 | XP_036982280.1                                                       | XP_024418993.1                                                       | XP_028002322.1                                                       | XP_019482109.1                   | XP_014393451.1                                                                                                                                                                                     | XP_006753876.2                                                                                                             | XP_006102735.1                                                                                                                                                                                                       | XP_036098207.1                                                                         | XP_036202946.1                                                                                                                                                                   | XP_016071215.1                                                       | XP_006908246.1 | XP_035873508.1                                     | XP_036303218.1                                                                                                                                                                                     | XP_011378004.1                   | XP_016004583.2                   | XP_036902533.1                                     |
| TRIM60 | XP_036996409.1<br>XP_036996412.1                                     | XP_024425064.1<br>XP_024424499.1                                     | XP_028007960.1<br>XP_008159979.1<br>XP_008144839.1                   | XP_019506122.1<br>XP_019506119.1 | XP_005860614.2<br>XP_005860607.1<br>XP_005871396.1<br>XP_014405902.1<br>XP_005860605.1<br>XP_005860608.1<br>XP_014397352.1<br>XP_005860610.1<br>XP_005863053.2<br>XP_005857391.2<br>XP_005860609.1 | XP_006778198.1<br>XP_006771143.1<br>XP_015424186.1<br>XP_006771132.2<br>XP_006771139.2<br>XP_006769185.2<br>XP_015424185.1 | XP_006085519.1<br>XP_006082057.1<br>XP_006085375.1<br>XP_014312894.1<br>XP_023606367.1<br>XP_023611695.1<br>XP_023608651.1<br>XP_006093847.2<br>XP_014305550.1<br>XP_006082053.1<br>XP_006082056.1<br>XP_006082054.2 | XP_036098006.1<br>XP_036137591.1<br>XP_036137494.1<br>XP_036138169.1<br>XP_036138069.1 | XP_036169282.1<br>XP_036169336.1<br>XP_036181774.1<br>XP_036171394.1<br>XP_036189687.1<br>XP_036194081.1<br>XP_036169073.1<br>XP_036204235.1<br>XP_036169177.1<br>XP_036168754.1 | XP_016053295.1<br>XP_016053282.1<br>XP_016053285.1<br>XP_016053283.1 | XP_006927091.1 | XP_028377047.1<br>XP_028376960.1                   | XP_036279954.1<br>XP_036282180.1<br>XP_036279950.1<br>XP_036281117.1<br>XP_036279951.1<br>XP_036280244.1<br>XP_036279955.1<br>XP_036314225.1<br>XP_036279952.1<br>XP_036279949.1<br>XP_036279953.1 | XP_023388480.1                   | XP_016010054.2<br>XP_036089258.1 | XP_036914221.1<br>XP_036914126.1                   |
| TRIM61 |                                                                      |                                                                      |                                                                      |                                  |                                                                                                                                                                                                    | XP_015424189.1                                                                                                             | XP_006082055.1                                                                                                                                                                                                       |                                                                                        | XP_036169906.1                                                                                                                                                                   |                                                                      |                | XP_028377048.2                                     |                                                                                                                                                                                                    |                                  |                                  |                                                    |
| TRIM62 | XP_037005392.1                                                       | XP_024410307.1                                                       | XP_008155201.1                                                       | XP_019514581.1                   | XP_014404979.1                                                                                                                                                                                     | XP_006777415.1                                                                                                             | XP_006094266.1                                                                                                                                                                                                       | XP_036112057.1                                                                         | XP_036205743.1                                                                                                                                                                   |                                                                      | XP_015454257.1 | XP_028369269.1                                     | XP_036301158.1                                                                                                                                                                                     | XP_011356206.1                   | XP_036076492.1                   | XP_036917408.1                                     |
| TRIM63 | XP_036991675.1                                                       | XP_024410511.1                                                       | XP_028011076.1                                                       | XP_019505661.1                   | XP_005875323.2                                                                                                                                                                                     | XP_006777571.2                                                                                                             | XP_014322865.1                                                                                                                                                                                                       | XP_036112463.1                                                                         | XP_036207050.1                                                                                                                                                                   | XP_016071928.1                                                       | XP_006924459.1 | XP_028368830.1                                     | XP_036300673.1                                                                                                                                                                                     | XP_011355952.1                   | XP_015985314.1                   | XP_036888754.1                                     |
| TRIM64 | XP_037009482.1<br>XP_037017898.1<br>XP_036995583.1<br>XP_037017908.1 |                                                                      |                                                                      | XP_019483848.1                   | XP_014400484.1                                                                                                                                                                                     | XP_006767198.1<br>XP_015421622.1                                                                                           |                                                                                                                                                                                                                      |                                                                                        |                                                                                                                                                                                  |                                                                      | XP_006926769.1 | XP_028370668.1                                     | XP_036284537.1                                                                                                                                                                                     | XP_023388208.1                   | XP_016008660.2                   | XP_036898845.1                                     |
| TRIM65 | XP_037013884.1                                                       |                                                                      | XP_008153407.1                                                       | XP_019499745.1                   |                                                                                                                                                                                                    |                                                                                                                            | XP_006109954.1                                                                                                                                                                                                       | XP_036124896.1                                                                         | XP_036196340.1                                                                                                                                                                   |                                                                      |                | XP_028376425.1                                     | XP_036268421.1                                                                                                                                                                                     |                                  | XP_036079121.1                   | XP_036921208.1                                     |
| TRIM66 | XP_036989749.1                                                       | XP_024414729.1                                                       | XP_028015698.1                                                       | XP_019484827.1                   | XP_014401327.1                                                                                                                                                                                     | XP_006763549.1                                                                                                             | XP_023610357.1                                                                                                                                                                                                       | XP_036114664.1                                                                         | XP_036181180.1                                                                                                                                                                   | XP_016062087.1                                                       | XP_024894573.1 | XP_035884871.1                                     | XP_036283123.1                                                                                                                                                                                     | XP_023378700.1                   | XP_036077483.1                   | XP_036906020.1                                     |
| TRIM67 | XP_036992664.1                                                       |                                                                      | XP_028013905.1                                                       | XP_019521378.1                   | XP_005856423.1                                                                                                                                                                                     |                                                                                                                            |                                                                                                                                                                                                                      | XP_036133550.1                                                                         | XP_036210823.1                                                                                                                                                                   |                                                                      |                | XP_028387130.1                                     | XP_036292228.1                                                                                                                                                                                     |                                  | XP_036091474.1                   | XP_036916130.1                                     |
| TRIM68 | XP_036991624.1                                                       | XP_024428536.1                                                       | XP_008159458.1                                                       | XP_019489255.1                   | XP_014388566.1                                                                                                                                                                                     | XP_006762422.1                                                                                                             | XP_014316235.1                                                                                                                                                                                                       | XP_036115788.1                                                                         | XP_036181087.1                                                                                                                                                                   | XP_016070521.1                                                       | XP_024900016.1 | XP_035884811.1                                     | XP_036283013.1                                                                                                                                                                                     | XP_023379664.1                   | XP_016013480.2                   | XP_036924518.1                                     |
| TRIM69 |                                                                      | XP_024423637.1                                                       | XP_008141307.1                                                       | XP_019500419.1                   |                                                                                                                                                                                                    |                                                                                                                            | XP_014305780.1                                                                                                                                                                                                       | XP_036123644.1                                                                         | XP_036155872.1                                                                                                                                                                   | XP_016067413.1                                                       | XP_006920476.1 | XP_028363377.1                                     | XP_036299457.1                                                                                                                                                                                     | XP_011353470.1                   |                                  |                                                    |
| TRIM71 | XP_037004115.1                                                       |                                                                      | XP_008152182.1                                                       | XP_019486275.1                   | XP_014403868.1                                                                                                                                                                                     |                                                                                                                            | XP_014310283.1                                                                                                                                                                                                       | XP_036121975.1                                                                         | XP_036188760.1                                                                                                                                                                   |                                                                      | XP_015452396.1 | XP_028374094.1                                     | XP_036286414.1                                                                                                                                                                                     | XP_011360586.1                   | XP_015996238.1                   | XP_036926649.1                                     |
| TRIM72 | XP_036986328.1                                                       | XP_024416349.1                                                       | XP_027983248.1                                                       | XP_019484054.1                   | XP_014385277.1                                                                                                                                                                                     | XP_015426163.1                                                                                                             |                                                                                                                                                                                                                      | XP_036136016.1                                                                         | XP_036166097.1                                                                                                                                                                   | XP_016073127.1                                                       | XP_006914229.1 | XP_028378238.1<br>XP_028386087.2                   | XP_036268927.1                                                                                                                                                                                     | XP_011376890.1                   | XP_015988313.2                   | XP_036923130.1                                     |
| TRIM75 | XP_036996426.1<br>XP_036996413.1<br>XP_036996411.1                   | XP_024424498.1<br>XP_024424756.1<br>XP_024424502.1<br>XP_024424609.1 | XP_008144795.1<br>XP_008144820.1<br>XP_008144850.1<br>XP_008144806.2 | XP_019506146.1<br>XP_019506117.1 | XP_005865783.1<br>XP_014390508.1<br>XP_005860869.1<br>XP_014390468.1<br>XP_005860616.1<br>XP_005860618.1<br>XP_014399511.1                                                                         | XP_015427596.1<br>XP_015424192.1<br>XP_006771087.1                                                                         | XP_006082058.1<br>XP_006082060.1<br>XP_023608630.1<br>XP_006093533.1<br>XP_006100042.1<br>XP_006089747.1                                                                                                             | XP_036097152.1<br>XP_036097403.1<br>XP_036138168.1                                     | XP_036169865.1<br>XP_036170783.1<br>XP_036169904.1<br>XP_036169907.1<br>XP_036170785.1<br>XP_036154915.1<br>XP_036186344.1<br>XP_036206166.1                                     | XP_016053296.1<br>XP_016053286.1<br>XP_016053281.1                   | XP_015448764.1 | XP_028374879.1<br>XP_028377597.1<br>XP_028376764.1 | XP_036280245.1<br>XP_036280701.1<br>XP_036280684.1<br>XP_036280700.1<br>XP_036280236.1                                                                                                             | XP_011362038.1                   | XP_036089259.1                   | XP_036914128.1<br>XP_036914125.1<br>XP_036914223.1 |
| TRIM77 | XP_037017904.1                                                       | XP_024408183.1                                                       |                                                                      |                                  |                                                                                                                                                                                                    |                                                                                                                            |                                                                                                                                                                                                                      | XP_036113755.1                                                                         |                                                                                                                                                                                  |                                                                      | XP_006926932.1 | XP_028370265.1                                     |                                                                                                                                                                                                    | XP_011361604.1                   | XP_016008661.2                   |                                                    |

**Table S2.** Positive selected sites identified by PAML(M8), or HYPHY (SLAC, FEL, MEM, FUBAR).

| Gene   | PAML      |           |                      |                        |                                                                                                                                                                                                                                                                                                                                                                                                                                                                                                               | HYPHY                                   |                                                                                                                             |                                                                                                                                                                                                                                                              |                                                   |
|--------|-----------|-----------|----------------------|------------------------|---------------------------------------------------------------------------------------------------------------------------------------------------------------------------------------------------------------------------------------------------------------------------------------------------------------------------------------------------------------------------------------------------------------------------------------------------------------------------------------------------------------|-----------------------------------------|-----------------------------------------------------------------------------------------------------------------------------|--------------------------------------------------------------------------------------------------------------------------------------------------------------------------------------------------------------------------------------------------------------|---------------------------------------------------|
|        | lnL M7    | lnL M8    | 2ΔlnL<br>(M7 vs. M8) | p_value<br>(M7 vs. M8) | M8 <sup>a</sup>                                                                                                                                                                                                                                                                                                                                                                                                                                                                                               | SLAC <sup>b</sup>                       | FEL <sup>c</sup>                                                                                                            | MEME <sup>d</sup>                                                                                                                                                                                                                                            | FUBAR <sup>e</sup>                                |
| TRIM5  | -32644.82 | -32434.64 | 420.38               | 0.000                  | 7,46,48,49,61,71,79,93,98,122,145,148,152,155,161,162,165,174,176,179,180,181,185,188,191,195,209,210,211,213,226,230,234,244,269,270,283,288,297,306,307,308,309,310,311,314,317,319,320,324,325,326,327,328,329,330,331,332,333,334,335,336,337,338,339,340,342,343,349,363,365,366,368,373,374,376,378,379,380,381,382,383,385,386,387,388,389,390,391,392,393,394,395,396,397,398,401,402,410,412,413,414,421,422,423,424,425,426,427,428,429,432,433,438,442,476,484,485,486,487,489,490,491,493,494,495 | 162,209,268,270,311,325,344,424,433,480 | 4,7,71,73,93,97,149,156,162,165,181,188,209,223,230,268,270,275,283,311,313,321,324,325,326,344,360,409,416,424,433,478,480 | 4,9,18,23,29,54,71,73,97,108,138,145,149,156,162,165,179,181,188,202,209,222,223,246,251,252,256,270,275,276,283,311,313,324,325,326,344,359,360,374,378,381,383,389,401,403,409,411,416,424,433,456,467,478,480,484,490                                     | 7,162,188,209,270,311,324,325,326,344,424,433,480 |
| TRIM13 | -5282.01  | -5250.82  | 62.37                | 0.000                  | 1,2,4,312,346,412                                                                                                                                                                                                                                                                                                                                                                                                                                                                                             |                                         | 312,346                                                                                                                     | 59,389                                                                                                                                                                                                                                                       | 36,133,312,346                                    |
| TRIM20 | -14407.60 | -14385.42 | 44.37                | 0.000                  | 55,59,65,104,174,183,193,195,217,225,229,255,273,302,310,371,395,425,431,432,577,661,670,671,675,676,677,678,680,681,684,687,688,689                                                                                                                                                                                                                                                                                                                                                                          | 55                                      | 55,218,229,395                                                                                                              | 55,58,68,106,108,115,119,122,137,180,183,194,195,200,203,214,218,223,225,230,238,255,263,264,267,273,281,282,289,313,320,322,351,354,361,363,364,371,378,386,387,389,400,437,445,504,511,526,533,564,569,630,655,660,663,665,669,671,673,674,676,677,679,689 | 55                                                |
| TRIM21 | -5451.73  | -5435.53  | 32.40                | 0.000                  | 46,50,60,405,416                                                                                                                                                                                                                                                                                                                                                                                                                                                                                              |                                         | 46,50,60,180,260,405                                                                                                        | 46,50,60,125,180,260,360,405                                                                                                                                                                                                                                 | 46,50,60,180,260,405                              |
| TRIM22 | -21774.11 | -21705.86 | 136.50               | 0.000                  | 4,5,10,19,23,44,45,46,47,48,49,53,79,86,87,89,92,120,121,122,146,189,198,228,248,253,258,260,262,269,288,290,293,297,302,303,323,38,340,344,346,348,353,390,392,403,404,406,407,409,412,427,428,453,510                                                                                                                                                                                                                                                                                                       | 19,290,409                              | 7,19,53,67,68,91,151,290,293,302,353,357,390,404,407,409,427,471                                                            | 4,7,13,19,29,37,41,45,50,62,67,68,74,105,110,120,137,145,146,151,187,217,239,248,275,276,279,290,293,298,302,315,323,330,353,357,390,402,404,409,449,451,493,502                                                                                             | 19,53,89,248,302,400,407,409,427,453              |
| TRIM23 | -4970.69  | -4964.70  | 11.97                | 0.003                  | 11,23,555,559,560,561,562,566                                                                                                                                                                                                                                                                                                                                                                                                                                                                                 |                                         |                                                                                                                             | 561,566                                                                                                                                                                                                                                                      |                                                   |
| TRIM24 | -11079.17 | -11022.77 | 112.81               | 0.000                  | 3,4,5,6,7,8,9,13,14,16,17,19,20,21,22,25,47,48,52,100,103,105,106,107,112,115,116,117,118,119,120,121,122,123,124                                                                                                                                                                                                                                                                                                                                                                                             |                                         |                                                                                                                             | 3,4,6,7,21,25,46,54,56,58,59,63,64,355,385,516,615,735,747                                                                                                                                                                                                   | 25                                                |
| TRIM25 | -10989.77 | -10960.90 | 57.75                | 0.000                  | 54,72,89,93,149,281,313,316,337,341,350,354,356,368,371,387,389,390,391,392,397,407,412,423,428,429,478,588,589,615,623                                                                                                                                                                                                                                                                                                                                                                                       |                                         | 412,423                                                                                                                     | 93,313,347,350,412,423,429,440,530                                                                                                                                                                                                                           | 337,412                                           |
| TRIM29 | -12198.15 | -12190.60 | 15.09                | 0.001                  | 140,142,770                                                                                                                                                                                                                                                                                                                                                                                                                                                                                                   |                                         | 770                                                                                                                         | 29,447,472,622,724,761,770,782,786                                                                                                                                                                                                                           | 770                                               |
| TRIM33 | -10163.69 | -10159.81 | 7.76                 | 0.021                  | 5,6                                                                                                                                                                                                                                                                                                                                                                                                                                                                                                           |                                         |                                                                                                                             | 2,3,5,7                                                                                                                                                                                                                                                      | 7,710                                             |
| TRIM34 | -8042.75  | -8035.51  | 14.48                | 0.001                  | 9,107,159,163,168,283,366,414,505,509                                                                                                                                                                                                                                                                                                                                                                                                                                                                         |                                         | 9,107,136,189                                                                                                               | 55,81,88,133,136,163,189,205,218,303,357                                                                                                                                                                                                                     | 9,107,163,189,505                                 |
| TRIM37 | -10419.03 | -10181.11 | 475.82               | 0.000                  | 968,969,970,971,972,973,974,975,976,977,979,980,981,982,983,985,986,987,988,989,990                                                                                                                                                                                                                                                                                                                                                                                                                           |                                         |                                                                                                                             | 7,768,972,980                                                                                                                                                                                                                                                | 980                                               |
| TRIM38 | -19320.11 | -19312.62 | 14.98                | 0.001                  | 47,50,55,56,181,206,228,229                                                                                                                                                                                                                                                                                                                                                                                                                                                                                   | 229                                     | 27,89,104,148,229                                                                                                           | 4,8,9,27,28,46,47,52,53,57,59,71,76,81,85,89,92,94,96,104,107,127,148,152,157,168,181,189,190,205,214,227,229                                                                                                                                                | 27,89,229                                         |

|        |           |           |        |       |                                                                                                                                                                                                                     |                                |                                                           |                                                                                                                                                                                                                           |                               |
|--------|-----------|-----------|--------|-------|---------------------------------------------------------------------------------------------------------------------------------------------------------------------------------------------------------------------|--------------------------------|-----------------------------------------------------------|---------------------------------------------------------------------------------------------------------------------------------------------------------------------------------------------------------------------------|-------------------------------|
| TRIM43 | -8556.49  | -8538.28  | 36.42  | 0.000 | 4,8,50,68,82,106,112,137,169,172,173,184,205,272,283,289,292,314,323,332,361,385,429,430,432,440,442,445,455,462                                                                                                    |                                | 50,332                                                    | 50,177,181,186,229,237,283,314,429,458                                                                                                                                                                                    | 50,169,314,332,432,442,456    |
| TRIM44 | -7106.06  | -7072.26  | 67.60  | 0.000 | 2,6,10,21,25,59,260,266,267,269,270,271,272,274                                                                                                                                                                     |                                |                                                           | 5,6,26,31,38,42,48,50,182,271,272,273,274                                                                                                                                                                                 |                               |
| TRIM45 | -8511.14  | -8505.68  | 10.91  | 0.004 | 19,24,77,84,163,359,450,501,506,535,546,548,549,551,568,570,571,573,574,577,579,580                                                                                                                                 |                                |                                                           | 262,283,400,497,498,504,505,515,518,525,540,544,551,552,560,580                                                                                                                                                           | 304,580                       |
| TRIM54 | -4339.02  | -4326.17  | 25.71  | 0.000 | 270                                                                                                                                                                                                                 |                                |                                                           |                                                                                                                                                                                                                           | 270                           |
| TRIM55 | -8167.15  | -8128.54  | 77.23  | 0.000 | 169                                                                                                                                                                                                                 |                                |                                                           | 57,58,63,67,80,90,93,94,97,102,113,169                                                                                                                                                                                    |                               |
| TRIM56 | -9273.58  | -9266.46  | 14.24  | 0.001 | 1,3,6,10,83,259,353,415,420,421,442,476                                                                                                                                                                             |                                |                                                           | 1,6,7,8,10,13,252,294,479,505                                                                                                                                                                                             |                               |
| TRIM60 | -37265.91 | -37192.27 | 147.27 | 0.000 | 4,37,84,100,125,149,163,168,169,195,197,202,234,275,290,308,311,317,320,321,322,323,324,325,330,354,356,358,360,373,375,384,385,386,387,388,389,390,392,393,394,395,396,397,398,399,400,401,402,429,444,452,454,458 | 37,274,277,311,320,324,354,372 | 18,37,110,238,240,245,274,277,311,320,324,354,372,386,446 | 2,3,18,37,42,48,83,95,100,107,110,127,141,150,153,156,168,176,188,198,234,237,238,240,245,274,275,277,295,301,306,308,311,315,320,324,332,350,352,354,358,369,372,375,385,387,394,402,414,416,420,443,446,450,455,457,458 | 18,37,274,277,311,320,324,354 |
| TRIM65 | -6766.77  | -6763.43  | 6.68   | 0.036 | 32,34,35,36,38,40,84,148,149,172,179,181,182,195,209,216,220,230,245,247,248,249,267,276,280,341,364                                                                                                                |                                |                                                           | 7,8,11,12,15,26,30,36,41,42,45,73,75,76,80,86,88,96,97,101,105,108,115,118,120,125,130,137,138,140,141,160,166,183,184,188,205,211,217,226,232,256,266,289,294,296,299,300,302,305,343,362,363,364                        | 34,36                         |
| TRIM69 | -5868.04  | -5856.62  | 22.85  | 0.000 | 36,37,49,123,199,200,201,202,209,215,219,221,225,226,251,282,290,334,357,358,363,373,375                                                                                                                            |                                | 123                                                       | 24,34,123,202,228,354,361,364,367,371,375                                                                                                                                                                                 | 123                           |
| TRIM75 | -29293.72 | -29277.40 | 32.65  | 0.000 | 47,59,90,134,167,170,180,182,197,269,270,328,381,386,397,454,462,464                                                                                                                                                | 38,85                          | 38,85,95,134,154,159,167,215,229,291,457                  | 9,13,21,24,38,73,83,84,85,87,95,98,101,111,121,139,154,159,167,209,215,225,229,236,240,243,273,288,291,329,377,380,402,405,412,418,420,429,435,457,462                                                                    | 38,215                        |
| TRIML2 | -10138.56 | -10125.39 | 26.33  | 0.000 | 2,4,5,8,9,10,11,12,13,14,15,16,17,18,26,32,48,54,55,59,77,88,101,136,137,147,148,150,152,154,170,177,191,195,198,209,210,222,224,232,270,291,324,335,339,357,425,437,438                                            |                                | 26,54,184,335,337,339                                     | 1,11,14,16,26,54,101,158,163,184,189,191,230,289,335,438,439                                                                                                                                                              |                               |

a) Codons with posterior probabilities >0.9 in the BEB analyses under M8 model.

b) Codons with significance level <0.05

c) Codons with significance level <0.05

d) Codons with significance level <0.05

e) Codons with posterior probabilities >0.9
